# Supplementary material for: Health insurance and child mortality in rural Burkina Faso
Source: PubMed Central journal article supplement (PMC4414785; doi:10.3402/gha.v8.27327), 2015-04-28
Supplement: GHA-8-27327-s001.pdf [file GHA-8-27327-s001.pdf]

**Supplementary Table 1: Effect of health insurance enrolment on child mortality in strata of the variables, most strongly associated with CBHI enrolment in 33 500 children from the Nouna HDSS**

| <i>Stratification Variable</i> | <i>Category</i> | <i>N</i> | <i>Hazard Ratio</i> | <i>P-Value</i> |
|--------------------------------|-----------------|----------|---------------------|----------------|
| <i>Distance</i>                | ≤5km            | 20 362*  | 0.56                | 0.019          |
|                                | >5km            | 13 138*  | 0.47                | 0.20           |
| <i>Residence</i>               | Rural           | 23 691   | 0.57                | 0.025          |
|                                | Nouna town      | 9809     | 0.51                | 0.18           |
| <i>SES</i>                     | Q5 (least poor) | 6897     | 0.59                | 0.15           |
|                                | Q4              | 6048     | 0.94                | 0.90           |
|                                | Q3              | 4831     | 0.28                | 0.074          |
|                                | Q2              | 4183     | 0.83                | 0.88           |
|                                | Q1 (poorest)    | 3611     | 0.32                | 0.27           |
| <i>Education of father</i>     | None            | 18 003   | 0.51                | 0.039          |
|                                | Basic           | 4746     | 0.58                | 0.29           |
|                                | Secondary       | 1183     | 0.52                | 0.53           |
| <i>Birthyear</i>               | 2000            | 3092     | 0.00                | 0.96           |
|                                | 2001            | 3037     | 0.00                | 0.97           |
|                                | 2002            | 3024     | 0.00                | 0.97           |
|                                | 2003            | 3216     | 0.40                | 0.19           |
|                                | 2004            | 3134     | 0.00                | 0.96           |
|                                | 2005            | 3187     | 1.05                | 0.91           |
|                                | 2006            | 3096     | 0.56                | 0.27           |
|                                | 2007            | 3311     | 0.80                | 0.64           |
|                                | 2008            | 3111     | 0.00                | 0.97           |
|                                | 2009            | 2688     | 1.61                | 0.40           |
|                                | 2010            | 2604     | 0.00                | 0.996          |
| <i>Mother insured at birth</i> | Non-insured     | 33 029   | 0.51                | 0.010          |
|                                | Insured         | 471      | 0.66                | 0.43           |

\*For frequency measures: distance in year 2005
